# Supplementary material for: Semantic Training for Cognitive Stimulation in Healthy Aging: Motives, Dimensions, and Usability of the CerUp Online Platform
Source: Preprints.org preprint supplement (doi:10.20944/preprints202406.0379.v1), 2024-06-06
Supplement: Supplementary file 1 [file supplementary]

**1. Categorias semânticas**

O participante vê várias palavras semanticamente relacionadas e uma que pertence a uma categoria semântica diferente; tem que escolher a que é semanticamente diferente.

**Níveis de dificuldade:** do básico ao avançado, de acordo com a frequência das palavras, familiaridade, complexidade da categoria e grau de desviância do intruso.

| Nível básico | | | | |
| --- | --- | --- | --- | --- |
| Peças de roupa | **Animais** | **Divisões da casa** | **Objetos de cozinha** | **Legumes** |
| Cortina 286 | **Árvore** 1934 | **Porta** 4921 | **Escova** 89 | **Banana** 104 |
| Camisola 357 | Leão 491 | Sala 3040 | Avental 104 | Cenoura 207 |
| Meias 225* | Vaca 535 | Cozinha 1315 | Panela 272 | Couve 177 |
| Camisa 539 | Galinha 436 | Quarto 2845 | Garfo 126 | Alface 109 |
| Casaco 568 | Gato 593 | Casa de banho | Prato 933 | Ervilhas 99* |
| Calças 488 | Ovelha 266 | Escritório 662 | Copo 837 | Espinafres 71* |
| Transportes | **Rios** | **Meteorologia** | **Instrumentos** | **Alimentos** |
| Pneu 164 | **Sintra** | **Céu** 1502 | **Computador** 1637 | **Prato** 933 |
| Carro 2926 | Mondego | Chuva 1839 | Violino 208 | Carne 1658 |
| Comboio 1197 | Tejo | Vento 2150 | Guitarra 271 | Peixe 1561 |
| Metropolitano 238 | Douro | Neve 844 | Flauta 106 | Sopa 1256 |
| Trator 113 | Sado | Temporal 517 | Bateria 113 | Massa 1895 |
| Autocarro 653 | Lima | Trovoada 95 | Piano 442 | Bolo 410 |
| Profissões | **Partes do corpo** | **Familiares** | **Futebol** | **Bebidas** |
| Desocupado | **Aquecedor** 18 | **Criança** 5652 | **Cesto** 290 | **Sopa** 1256 |
| Político 18819 | Mão 7806 | Pai 5932 | Ganhar 5183 | Água 8340 |
| Professor 3082 | Olho 6030 | Mãe 4439 | Jogador 3269 | Sumo 273 |
| Militar 2641 | Cabeça 4663 | Irmão 2718 | Golo 2292 | Cerveja 335 |
| Polícia 1895 | Pé 4263 | Avô 1018 | Árbitro 1373 | Vinho 2320 |
| Ator 1419 | Braço 2638 | Filho 7644 | Bola 1148 | Chá 579 |
| Plantas | **Eletrodomésticos** | **Emoções** |  | **Exemplo: Verbos** |
| Tronco 501 | **Panela** 272 | **Chorar** 1272 |  | **Calor** 1311 |
| Macieira 23 | Microondas | Felicidade 628 |  | Sair 6652 |
| Orquídea 28 | Forno 762 | Tristeza 495 |  | Ficar 18031 |
| Palmeira 140 | Aquecedor 18 | Alegria 1142 |  | Pensar 8140 |
| Bambu 46 | Fogão 173 | Raiva 344 |  | Aprender 1653 |
| Nenúfar 20 | Torradeira 6 | Frustração 183 |  | Questionar 483 |

| Nível intermédio | | | | |
| --- | --- | --- | --- | --- |
| Objetos para dormir | **Objetos de trabalho** | **Árvores** | **Sobremesas** | **Acessórios** |
| Saia 521 | **Colher** 1082 | **Cortiça** 221 | **Fiambre** 99 | **Camisola** 357 |
| Cobertor 142 | Candeeiro 301 | Palmeira 140 | Gelatina 52 | Cinto 196 |
| Pijama 75 | Secretária 436 | Pinheiro 238 | Gelado 277 | Mala 447 |
| Meias 225 | Cadeira 1138 | Carvalho 30 | Pudim 65 | Relógio 761 |
| Cama 1863 | Caneta 143 | Sobreiro 175 | Queques 45* | Gravata 264 |
| Almofada 128 | Papel 4743 | Eucalipto 200 | Bolo 410 | Anéis 369* |
| Alimentos salgados | **Línguas da Europa** | **Legumes verdes** | **Quantificação temporal** | **Frutos secos** |
| Chocolate 218 | **Chinês** 1436 | **Cenoura** 207 | **Quente** 1604 | **Laranja** 151 |
| Chouriço 99 | Espanhol 2581 | Favas 101* | Dia 21896 | Nozes 117* |
| Azeitonas 157* | Inglês 1885 | Alface 109 | Semana 6141 | Avelãs 29* |
| Manteiga 846 | Francês 2968 | Espinafres 71* | Mês 6862 | Amêndoas 147* |
| Queijo 599 | Português 12656 | Espargos 32* | Ano 36764 | Amendoim 39 |
| Presunto 194 | Alemão 614 | Pepino 53 | Século 5289 | Pinhão 56 |
| Pontos cardeais | **Ciclo da vida** | **Animais terrestres** | **Transportes terrestres** | **Desportos** |
| Pólo 464 | **Aprender** 1653 | **Rola** 78 | **Avião** 1128 | **Flutuação** 156 |
| Norte 2249 | Nascer 2965 | Cabra 278 | Mota 29 | Ciclismo 113 |
| Sudeste 178 | Crescer 2209 | Elefante 223 | Comboio 1197 | Boxe 74 |
| Noroeste 228 | Reproduzir 334 | Gato 593 | Automóvel 1348 | Ténis 366 |
| Sul 2224 | Envelhecer 205 | Girafa 27 | Bicicleta 200 | Equitação 49 |
| Este 96 | Morrer 4110 | Rato 505 | Autocarro 653 | Hóquei 302 |
| Objetos de banho | **Ciências** | **Joias** |  | **Exemplo: Animais marinhos** |
| Duche 77 | **Português** 12656 | **Gancho** 66 |  | **Sapo** 48 |
| Champô | Geologia 36 | Anel 369 |  | Tubarão 78 |
| Condicionador | Matemática 249 | Pulseira 191 |  | Raia 106 |
| Esponja 64 | Biologia 80 | Colar 481 |  | Polvo 167 |
| Sabão 87 | Química 176 | Brincos 179* |  | Baleia 58 |
| Toalha 279 | Física 246 | Relógio 761 |  | Lagosta 117 |

| Nível avançado | | | | |
| --- | --- | --- | --- | --- |
| Doenças físicas | **Fruta com caroço** | **Órgãos** | **Material artístico** | **Especiarias** |
| Depressão 287 | **Morango** 71 | **Unhas** 340* | **Calculadora** 39 | **Azeite** 683 |
| Diabetes 89 | Cereja 81 | Pulmões 251* | Cola 151 | Pimenta 995 |
| Hipertensão 62 | Ameixa 29 | Pele 1764 | Lápis 257 | Colorau 40 |
| Pneumonia 98 | Pêssego 51 | Coração 2213 | Cartolina 46 | Canela 131 |
| Otite 18 | Manga 269 | Fígado 281 | Tesoura 138 | Gengibre 25 |
| Artrite 32 | Pera 161 | Rins 174* | Marcadores 623* | Açafrão 20 |
| Títulos de nobreza | **Capitais** | **Peixes** | **Cereais** | **Insetos** |
| Ministro 4182 | **Porto** | **Camarão** 140 | **Cacau** 41 | **Lesma** 12 |
| Rei 1995 | Paris | Salmão 42 | Centeio 153 | Barata 142 |
| Conde 300 | Madrid | Pescada 43 | Trigo 421 | Aranha 136 |
| Duque 264 | Roma | Dourada 6 | Cevada 10 | Formiga 109 |
| Príncipe 560 | Atenas | Truta 64 | Arroz 541 | Borboleta 112 |
| Marquês 149 | Londres | Atum 130 | Aveia 44 | Gafanhoto 40 |
| Raças de cão | **Seres vivos** | **Tipos de dança** | **Emoções positivas** | **Ossos** |
| Siamês | **Azeitonas** 157* | **Ópera** 474 | **Desespero** 384 | **Joelho** 680 |
| Dálmata 0 | Rosas 475* | Tango 47 | Felicidade 628 | Tíbia 17 |
| Galgo 32 | Pavão 36 | Ballet | Aceitação 306 | Falange 45 |
| Labrador | Abóbora 72 | Samba | Prazer 1058 | Fémur 19 |
| Pastor Alemão | Rã 92 | Salsa 476 | Satisfação 522 | Crânio 115 |
| Caniche | Orquídea 28 | Valsa 55 | Entusiasmo 514 | Costelas 100 |
| Patentes militar | **Sólidos geométricos** | **Oceanos** |  | **Exemplo:** **Continentes** |
| Tropa 776 | **Retângulo** 178 | **Mediterrâneo** |  | **América do Norte** |
| Capitão 865 | Cubo 142 | Pacífico |  | Ásia |
| Tenente 177 | Cone 64 | Glacial Antártico |  | Europa |
| Sargento 234 | Pirâmide 210 | Atlântico |  | Oceânia |
| Cabo 618 | Esfera 444 | Índico |  | África |
| General 1022 | Cilindro 154 | Glacial Ártico |  | Antártida |

**Nota:**

- A seguir são apresentadas categorias que poderão ser usadas neste exercício;
- Os números à frente das palavras representam a Lexical Frequency – Corlex, retirado de Porlex;
- Os * representam palavras em que apenas o singular fazia parte da base de dados, sendo que o número representa a frequência dessa palavra no singular;
- Palavras sem nenhum número associado não faziam parte da base de dados.

**2.** **Relações sintagmáticas e paradigmáticas**

O participante tem que combinar palavras ou frases respeitando as relações sintagmáticas ou paradigmáticas.

**Nível básico:** completar uma frase simples com uma das opções;

**Nível intermédio:** completar frases mais complexas com uma das opções;

**Nível avançado:** associar um número a uma letra de modo que as duas partes formem uma frase com um sentido lógico.

| Nível básico | | |
| --- | --- | --- |
| Erros semânticos | | |
| O Paulo comeu…   1. … um gelado 2. … o banco 3. … uma história 4. … a porta | No jardim cresce…   1. **… uma flor** 2. … o carro 3. … uma tesoura 4. … a colher | Os carros andam…   1. **… depressa** 2. … felizes 3. … preocupados 4. … chateados |
| O Luís joga…   1. … futebol 2. … casas 3. … bonecas 4. … matemática | As casas são…   1. **… brancas** 2. … inteligentes 3. … tristes 4. … magras | Os jardineiros arranjam…   1. **… a relva** 2. … os carros 3. … uma camisola 4. … a banana |
| No caderno escreves…   1. … os apontamentos 2. … o avião 3. … o sofá 4. … as mãos | O narrador é a pessoa que conta…   1. **… a história** 2. … o comboio 3. … a janela 4. … o café | A Ana queria vestir…   1. **… um vestido** 2. … uma caneta 3. …um chocolate 4. …uma colher |
| Quando fui à janela, vi que estava a…   1. … chover 2. … trazer 3. … encontrar 4. … ficar | Os vizinhos discutiam…   1. **… a situação** 2. … o palco 3. … o coelho 4. … a semana | Esta biblioteca é muito…   1. **… bonita** 2. … inteligente 3. … esperta 4. … saudável |
| Acabei mesmo agora de ver as notícias…   1. … no jornal 2. … na massa 3. … no elefante 4. … na almofada | Estou a ler…   1. **… um livro** 2. … um sapato 3. … uma alface 4. … uma cadeira | Estas chaves são daquelas duas…   1. **… portas** 2. … laranjeiras 3. … meias 4. … lâmpadas |
| O António tinha uma mota…   1. … vermelha 2. … magra 3. … introvertida 4. … aborrecida | Ele contou uma história…   1. **… aos amigos** 2. … aos sapatos 3. … ao alicate 4. … ao limão | Os pais chamaram-nos até…   1. **… à mesa** 2. … à banana 3. … às calças 4. … ao lápis |
| O Joel atendeu…   1. … o telefone 2. … a panela 3. … o pulmão 4. … a tesoura | Pedi à minha irmã para acender…   1. **… o candeeiro** 2. … a estante 3. … o sofá 4. … a rosa | Esta manhã comecei a arrumar…   1. **… a casa** 2. … o sul 3. … o mês 4. … o equilíbrio |
| A Joana ofereceu-me um cestinho de…   1. … laranjas 2. … secretárias 3. … autocarros 4. … eucaliptos | A Sofia estava a comer um bolo de…   1. **… cenoura** 2. … mesa 3. … cola 4. … meias | A colina tem muitas…   1. **… árvores** 2. … salas 3. … camisas 4. … canecas |
| Exemplo: Todos os dias vou correr…   1. … na praia 2. … na cama 3. … no céu 4. … no gato |  |  |
| Erros sintáticos | | |
| Os meus amigos gostam de ir…   1. … à praia 2. … uma tábua 3. … chover 4. … ao ano | A Maria é uma boa…   1. **… amiga** 2. … caminhar 3. … simpática 4. … depressa | A Joana comprou…   1. **… um carro** 2. … ir 3. … Norte 4. … bonito |
| O tempo passa…   1. … devagar 2. … saber 3. … boneca 4. … casaco | Os pais já vieram…   1. **… do mercado** 2. … chegar 3. … é azeite 4. … ficar | A vizinha foi…   1. **… simpática** 2. … rosa 3. … gostar 4. … caderno |
| Acho que vou dormir…   1. … uma sesta 2. … não chorava 3. … cada laranja 4. … golfinho | A Carolina tem…   1. **… um chapéu** 2. … entrar 3. … feliz 4. … da árvore | Hoje levei o meu carro…   1. **… para o mecânico** 2. … rir supermercado 3. … um cabelo 4. … sentir isto |
| O João apresentou a Ana…   1. … ao avô 2. … pensar alface 3. … calma interessante 4. … jovens | O meu pai é…   1. **… médico** 2. … perguntar 3. … vinagre 4. … cama | Ele conseguiu resolver os seus…   1. **… problemas** 2. … trabalhar 3. … combinava 4. … alto |
| Já tinha visto…   1. … este filme 2. … olhar futuro 3. … bonita mãe 4. … aproximação dos veículos | Eu não sou…   1. **… preguiçoso** 2. … emoções 3. … viver 4. … histórias | O gato enrolava-se nos papéis de embrulho e…   1. … **rasgava-os** 2. … sempre 3. … perguntas 4. … fé |
| Ele sabe tocar…   1. … violino 2. … vida 3. … questionam-se 4. … cantar | Antigamente, acreditava-se que a Terra era…   1. **… plana** 2. … diz 3. … cozinha 4. … brilhar | O Filipe está…   1. **… atrasado** 2. … o meu irmão 3. … corpo 4. … loja |
| Ele espalhou…   1. … os papéis 2. … dormir confortavelmente 3. … maravilhoso 4. … noite | O macaco roubou…   1. **… bolachas** 2. … desenhar 3. … simpático 4. … fechado | O gato arranhou…   1. **… o sofá** 2. … ouvir bem 3. … colocação 4. … segurança |
| Os bombeiros recolheram…   1. … a escada 2. … então saímos 3. … ajudar 4. … aparelho | Os professores observaram…   1. **… a sala** 2. … garantia 3. … aumentar poupança 4. … liga antes | A Mariana saiu de casa e dirigiu-se para…   1. **… o supermercado** 2. … ninguém 3. … gosto disso 4. … crescer |
| Exemplo: Amanhã tenho que ir…   1. … ao supermercado 2. … gato giro 3. … um morango 4. … fiz |  |  |

| Nível intermédio | | |
| --- | --- | --- |
| Erros semânticos | | |
| Nas tardes de outono, a Catarina e o Afonso…   1. … gostam de ir passear com o seu cão 2. … vão ao gelado com as meias 3. … sentem a mota bonita 4. … saem de mala com a casa | A mãe está a preparar…   1. **… um lanche delicioso** 2. … um pinheiro feliz 3. … um relógio triste 4. … um caderno feio | Quando está sol, …   1. **… a areia fica quente** 2. … a panela é azul 3. … o sofá é pequeno 4. … a laranja vai sentar |
| Na minha rua, …   1. … passam muitas pessoas em direção ao supermercado todos os dias 2. … nunca te deslumbraste com o sucesso 3. … saem comboios inteligentes 4. … perguntam gatos para ficar | Enquanto a Maria falava, …   1. **… ia abrindo e fechando gavetas** 2. … as cerejas estavam raras 3. … eu sabia que o queijo era aparafusado 4. … ia semeando os olhos na varanda | O Pedro e o João olharam para mim com inveja, por eu…   1. **… ter conseguido encontrar a solução** 2. … brincar com anos 3. … estar no leão feliz 4. … ser professor de casacos |
| Sentaram-se no sofá e ele contou-lhe…   1. … histórias da família 2. … uma grande amiga 3. … um apoio magro 4. … uma saborosa camisola | A casa ficava no meio de uma floresta, …   1. **… com grades árvores e arbustos à sua volta** 2. … completada com histórias 3. … com arbustos polares e rios afetuosos 4. … com azeite e perguntas no ar | Nos primeiros dias de março…   1. **… chovia torrencialmente** 2. … caíam estudos do chão 3. … conhecia a pausa 4. … cozinhava camisas |
| A Helena tinha um caderno novo, mas…eHeff   1. … na escola rasgaram-no 2. … as pessoas são frias 3. … é engraçado 4. … a festa estava limpa | Como a Joana mora perto de minha casa, …   1. **… pedi-lhe que esperasse por mim** 2. … os carros estão à chuva 3. … as couves fugiram 4. … pensei fechar a lima | O gato fugiu assustado, apesar…   1. **… de ninguém lhe ter feito mal** 2. … do João estar na cebola 3. … do comboio andar feliz 4. … do saco ter carros |
| A Sónia vestiu o casaco…   1. … para ir a casa da filha 2. … e foi às bolachas do café 3. … por queimar canetas 4. … porque as nozes saíram | Como estou cansado, …   1. **… vou descansar** 2. … sou uma tarte 3. … a planta chora 4. … o pijama é bonito | Naquele outono, todos os dias foram passados a…   1. **… apreciar a natureza em casa dos avós** 2. … vestir o teu aniversário 3. … comer sopa preocupada 4. … sair muito amarelo |
| Exemplo: Não há razões para…   1. … ele se preocupar 2. … o jantar ser verde 3. … o Francisco estar devagar 4. … sair com pratos |  |  |
| Erros sintáticos | | |
| Primeiro temos de ir…   1. … ajudar a tia 2. … bicicleta para sair 3. … mosca é bonita 4. … música alta | O prato da Antónia…   1. **… tem muitos legumes** 2. … ficar muito triste 3. … camisola é verde 4. … praia no Sul | Este museu…   1. **… tem muitas pinturas** 2. … bolachas são doces 3. … gato muito bonito 4. … pequenas calças |
| Quando o Renato terminou a sua corrida matinal, …   1. … o seu coração batia tanto que parecia que ia sair do peito 2. … gerir é complicado 3. … o jantar vai ser frango assado 4. … tenho que ir pagar estas compras | O Henrique prepara-se para atirar uma bola…   1. **… ao amigo que está na piscina** 2. … tinha sido uma escolha minha 3. … o carro estava avariado 4. … a máquina fechou | Ele foi para casa da amiga…   1. **… por causa do trabalho da escola** 2. … a cama já está feita 3. … o cão correu atrás da bola 4. … chegou a minha madrinha |
| O Miguel e a Joana tiveram um acidente, mas…   1. … o mecânico vai-lhes reparar o carro 2. … comprar umas meias 3. … beber um chocolate quente muito bom 4. … colocar salsa | Ele estava tão chateado com a irmã…   1. **… que nem lhe dava os bons dias** 2. … foi difícil adaptar ao emprego 3. … tomar conta das crianças 4. … pensamos fazer o que eu gosto | Os dois tiraram um bom curso, …   1. **… o que lhes permitirá encontrar um bom emprego** 2. … vão para Paris outra vez 3. … bastava de laranjas azuis 4. … estava destruída |
| Ontem a senhora trouxe compras pesadas…   1. … e chegou a casa muito cansada 2. … o telemóvel dela era novo 3. … neste momento a vida mudou 4. … já percebemos o que aconteceu | A Margarida deixou os brinquedos no carro…   1. **… e agora não pode ir buscá-los** 2. … é muito respeitador 3. … ele é o meu melhor amigo 4. … a atenção vai ter que ser dividida | O Pedro gostou muito da história, por isso…   1. **… a professora vai contá-la mais uma vez** 2. … foi obrigada mais uma vez 3. … que saia gira 4. … produtos portugueses |
| Como a filha tinha saído para comprar pão, a Fernanda…   1. … deixou-lhe um recado na mesa e foi embora 2. … gelados salgados são muito saborosos 3. … na avenida havia festa 4. … é um nome muito giro para este gato | Muitas pessoas vieram para a rua…   1. **… para ver o jogo no ecrã gigante** 2. … a loja vendeu muita roupa 3. … amanhã vai estar um dia de sol 4. … o cão correu atrás da bola | Quando o padrinho lhe explicou que o brinquedo estava partido, …   1. **… o menino ficou triste** 2. … acho que a entrega chegou 3. … também não deve saber 4. … estava muito bem decorada |
| Exemplo: Nesta semana, a Sandra…   1. … conseguiu fazer o trabalho 2. … esta caneta escreve bem 3. … está muito calor 4. … peluche giro |  |  |

| Nível avançado | | |
| --- | --- | --- |
| 1. Ela não perdeu | **→** | 1. aquilo que lhe dei. |
| 1. Não aprecio muito | **→** | 1. o vinho do Porto. |
| 1. Levanto-me todos | **→** | 1. os dias cedo. |
| 1. Não há nada melhor | **→** | 1. do que ser feliz. |
| 1. Nos dias frios tenho | **→** | 1. sempre um cachecol por perto. |
| 1. A Andreia costuma dar | **→** | 1. uma volta no Parque da Cidade. |
|  |  |  |
| 1. Olha que a Joana tem | **→** | 1. um discurso muito bom. |
| 1. Passou muito tempo desde que | **→** | 1. a vi na minha cidade. |
| 1. Os meus filhos | **→** | 1. não param quietos. |
| 1. O cabelo dela | **→** | 1. é loiro. |
| 1. A Adriana é | **→** | 1. uma rapariga séria. |
| 1. Ver filmes de desenhos animados | **→** | 1. é uma diversão. |
|  |  |  |
| 1. Ter carta de condução | **→** | 1. é muito útil. |
| 1. A Sónia acompanha sempre | **→** | 1. um bom programa com emoção. |
| 1. Para o ano quero passar | **→** | 1. as férias de Verão fora. |
| 1. O Ângelo tem boa | **→** | 1. aptidão para a música. |
| 1. Não sei se | **→** | 1. terei tempo para isso. |
| 1. A vizinha dele | **→** | 1. também é muito simpática. |
|  |  |  |
| 1. Se eu pudesse ajudava | **→** | 1. mais os meus filhos |
| 1. Adorava conseguir concretizar | **→** | 1. todos os meus grandes sonhos. |
| 1. Se fizeres por isso poderás | **→** | 1. conseguir bons resultados. |
| 1. A minha vizinha sempre foi | **→** | 1. muito prestável connosco. |
| 1. Já não me lembrava | **→** | 1. como era sentir-me assim. |
| 1. A minha filha tem | **→** | 1. um bom emprego. |
|  |  |  |
| 1. A água é essencial | **→** | 1. para o nosso organismo. |
| 1. Eles têm um gato branco | **→** | 1. que é muito meigo. |
| 1. Nem todas as pessoas sabem | **→** | 1. procurar um bom emprego. |
| 1. Se tivermos a família reunida | **→** | 1. é uma animação. |
| 1. O tempo anda | **→** | 1. estranho nos últimos dias. |
| 1. Ela tem um nariz | **→** | 1. muito longo e estreito. |
|  |  |  |
| 1. A menina foi para a escola | **→** | 1. muito feliz e animada. |
| 1. O Pedro sorria | **→** | 1. sempre que ela olhava. |
| 1. O gato era preto | **→** | 1. como a noite. |
| 1. O Pai da Joana é professor | **→** | 1. e gosta muito. |
| 1. A sineta do portão tocou | **→** | 1. quando eles chegaram. |
| 1. Deram-lhe um casaco | **→** | 1. como prenda de anos. |
|  |  |  |
| Exemplo: |  |  |
| 1. O meu gatinho é | **→** | 1. pequenino e muito brincalhão. |
| 1. Está calor, por isso | **→** | 1. vamos à praia. |
| 1. O Afonso é sempre | **→** | 1. muito resmungão. |
| 1. No meu jardim existem | **→** | 1. muitas flores e árvores. |

**3. Classificação semântica**

Uma lista de palavras tem que ser ligada a uma ou duas categorias semânticas pré-definidas.

**Níveis básico e intermédio:** o participante escolhe a categoria correta, de entre duas opções, com crescente dificuldade de acordo com a frequência das palavras, familiaridade, complexidade da categoria e grau de desviância do intruso;

**Nível avançado:** quatro listas de palavras para serem ligadas às respetivas categorias (com duas opções de categorias como distração).

| Nível básico | | | | |
| --- | --- | --- | --- | --- |
| Flores  Legumes | **Animais**  Raças | **Cidades**  Capitais | **Mobiliário**  Divisões da casa | **Alimentos**  Bebidas |
| Túlipa 0 | Mosca 273 | Coimbra | Sofá 307 | Pescada 43 |
| Margarida 8 | Gato 593 | Porto | Cadeira 1138 | Alface 109 |
| Rosa 475 | Leão 491 | Lisboa | Estante 174 | Queijo 599 |
| Cravo 180 | Abelha 120 | Braga | Secretária 436 | Morango 71 |
| Girassol 56 | Coelho 136 | Faro | Mesa 2633 | Presunto 194 |
| Orquídea 28 | Lobo 279 | Guimarães | Cama 1863 | Massa 1895 |
| Lírio 83 | Macaco 156 | Portimão | Guarda-roupa 60 | Pêssego 51 |
| Roupa  Acessórios | **Árvores**  Ervas | **Objetos**  Atividades | **Países**  Cidades | **Ferramentas**  Eletrodomésticos |
| Calças 488 | Pinheiro 238 | Copo 837 | Portugal | Martelo 146 |
| Calções 87* | Cerejeira 24 | Estojo 79 | Espanha | Pincel 142 |
| Sapatos 677* | Azinheira 80 | Clipe | Suíça | Berbequim 21 |
| Saia 521 | Eucalipto 200 | Prato 933 | Luxemburgo | Serra 876 |
| Camisa 539 | Carvalho 30 | Candeeiro 301 | Inglaterra | Chaves de fendas |
| Meias 225* | Laranjeira 48 | Caderno 375 | França | Alicate 35 |
| Casaco 568 | Oliveira 80 | Sacos 661* | Canadá | Chave inglesa |
| Características  Defeitos | **Doces**  Laticínios | **Frutas**  Plantas | **Legumes**  Frutas | **Exemplo:**  **Verbos**  Adjetivos |
| Bonito 1389 | Pipocas 16* | Laranja 151 | Brócolos 7 | Encontrar 12785 |
| Simpático 383 | Bolo 410 | Maçã 298 | Abóbora 72 | Ver 23398 |
| Tímido 271 | Gelado 277 | Banana 104 | Aipo 56 | Perguntar 3028 |
| Extrovertido | Bolachas 140* | Limão 422 | Alface 109 | Amar 1216 |
| Maravilhoso 402 | Gelatina 52 | Pera 161 | Pepino 53 | Vender 2597 |
| Inteligente 437 | Bombons 34* | Uvas 158* | Cenoura 207 | Gostar 6243 |
| Alto 5752 | Crepes 49* | Manga 269 | Couve 177 | Semear 237 |

| Nível intermédio | | | | |
| --- | --- | --- | --- | --- |
| Géneros cinematográficos  Géneros literários | **Arte**  Estética | **Animais terrestres**  Animais mamíferos | **Doenças crónicas**  Doenças físicas | **Desportos**  Lazer |
| Romance 786 | Pintura 1081 | Sapo 48 | Asma 47 | Esgrima 31 |
| Policial 509 | Escultura 493 | Jaguar 0 | Hipertensão 62 | Badminton |
| Mistério 668 | Música 2491 | Ornitorrinco | Cancro 412 | Natação 152 |
| Drama 513 | Cinema 1686 | Salamandra 15 | Diabetes 89 | Hipismo 12 |
| Musical 713 | Teatro 1512 | Panda 0 | Alzheimer | Xadrez 161 |
| Comédia 337 | Dança 696 | Gorila 14 | Acidente Vascular Cerebral (AVC) | Mergulho 107 |
| Ação 5062 | Fotografia 1268 | Caracol 133 | Esclerose múltipla | Boxe 74 |
| Chás  Ervas | **Bebidas alcoólicas**  Bebidas raras | **Catástrofes naturais**  Fenómenos astronómicos | **Armas**  Ferramentas | **Transportes aéreos**  Veículos |
| Camomila 0 | Vinho 2320 | Sismo 135 | Espada 393 | Avião 1128 |
| Verde 1429 | Cerveja 335 | Tornado 208 | Pistola 212 | Helicóptero 185 |
| Preto 503 | Uísque | Tsunami | Punhal 155 | Jato |
| Cidreira 11 | Aguardente 166 | Ciclone 67 | Granada 76 | Foguetão 71 |
| Tília 23 | Rum | Erupção vulcânica | Bastão 41 | Balão de ar quente |
| Lúcia Lima | Vodca | Furacão 38 | Machado 171 | Avioneta |
| Gengibre 25 | Gim | Inundação 261 | Adaga | Dirigível |
| Órgãos  Músculos | **Doenças mentais**  Doenças físicas | **República**  Monarquia | **Línguas**  Nacionalidades | **Exemplo: Transportes marítimos**  Transportes de luxo |
| Pulmões 251* | Psicose 39 | Eleições 2772 | Russo | Navio 891 |
| Faringe 20 | Esquizofrenia 29 | Ministério 571 | Mandarim | Submarino 83 |
| Intestino delgado | Ansiedade 269 | Presidente 8485 | Castelhano 162 | Caravela 62 |
| Bexiga 35 | Bipolaridade | Deputado 1895 | Alemão 614 | Iate 153 |
| Útero 109 | Demência 39 | Ministro 4172 | Italiano 1355 | Petroleiro |
| Pâncreas 11 | Anorexia 31 | Secretário 1544 | Latim 291 | Nau 211 |
| Fígado 281 | Depressão 287 | Procurador 181 | Japonês 690 | Caiaque 0 |

| Nível avançado | | | | |
| --- | --- | --- | --- | --- |
| Citrinos | **Fruta tropical** | **Frutos vermelhos** | **Legumes** | **Opções:** |
| Limão 422 | Ananás 62 | Amora 59 | Cebola 661 | Citrinos |
| Lima 23 | Ameixa 29 | Mirtilos | Pimento 143 | Fruta tropical |
| Tangerina 18 | Manga 269 | Framboesa | Brócolos 7 | Frutos vermelhos |
| Laranja 151 | Maracujá | Cerejas 81* | Ervilhas 92* | Legumes |
| Toranja 0 | Coco 48 | Morango 71 | Abóbora 72 | Sementes |
| Clementina 0* | Papaia 0 | Groselhas 19 | Milho 605 | Cereais |
| Pomelo | Abacate 35 | Bagas de Goji | Favas 101* |  |
| Animais ovíparos | **Animais mamíferos** | **Animais selvagens** | **Répteis** | **Opções:** |
| Rã 92 | Golfinho 99 | Leão 491 | Crocodilo 72 | Animais ovíparos |
| Sapo 48 | Gato 593 | Tigre 107 | Cobras 142* | Animais mamíferos |
| Aranha 136 | Macaco 156 | Gorila 14 | Lagarto 73 | Animais selvagens |
| Cegonha 48 | Elefante 223 | Hipopótamo 29 | Tartaruga 67 | Répteis |
| Pinguim 21 | Porco 685 | Pantera 20 | Iguana | Anfíbios |
| Baratas 142* | Morcego 49 | Tubarão 78 | Jacaré 21 | Predadores |
| Tartaruga 67 | Zebra 18 | Girafa 27 | Camaleão 32 |  |
| Salgados | **Laticínios** | **Proteínas** | **Doces** | **Opções:** |
| Empadas | Leite 1009 | Carne 1658 | Mousse | Salgados |
| Fiambre 99 | Iogurte 42 | Peixe 1561 | Tarte | Laticínios |
| Presunto 194 | Queijo 599 | Tofu 42 | Fruta 469 | Proteínas |
| Rissóis | Manteiga 846 | Ovos 1140 | Batido 8 | Doces |
| Quiche | Natas 301* | Marisco 172 | Pastel 92 | Lípidos |
| Pizza | Margarina 93 | Soja 33 | Chocolate 218 | Vitaminas |
| Pão 1357 | Gelado 277 | Iogurte 42 | Gelado 277 |  |
| Andebol | **Hóquei** | **Ténis** | **Voleibol** | **Opções:** |
| Baliza 504 | Jogador 3269 | Rede 2558 | Equipa 6138 | Andebol |
| Bola 1148 | Patins 215* | Bola 1148 | Ponto 7998 | Hóquei |
| Equipamento 1339 | Capacete 149 | Raquete 0 | Passes 201* | Ténis |
| Equipa 6138 | Taco 45 | Ponto 7998 | Serviço 6974 | Voleibol |
| Campo 4298 | Ringue | Árbitro 1973 | Ataque 1512 | Basquetebol |
| Árbitro 1373 | Zona ofensiva | Jogo 7416 | Manchete 48 | Atletismo |
| Defesa 2499 | Disco 776 | Campo 4238 | Falta 3623 |  |
| Capitais asiáticas | **Capitais africanas** | **Países sul-americanos** | **Países europeus** | **Opções:** |
| Tóquio | Luanda | Argentina | Áustria | Capitais asiáticas |
| Pequim | Cairo | Bolívia | Chipre | Capitais africanas |
| Banguecoque | Bissau | Chile | Dinamarca | Países sul-americanos |
| Seul | Praia | Equador | Hungria | Países europeus |
| Jerusalém | São Tomé | Paraguai | Malta | Capitais europeias |
| Nova Deli | Dacar | Venezuela | Lituânia | Países asiáticos |
| Singapura | Cidade do Cabo | Colômbia | Suécia |  |
| Unidades de massa | **Unidades de volume** | **Unidades de tempo** | **Unidades de comprimento** | **Opções:** |
| Quilograma 74 | Galões 54* | Minuto 3478 | Polegada 39 | Unidades de massa |
| Libras 299* | Metro cúbico | Dias 21896* | Nanometro | Unidades de volume |
| Onças 49* | Litro 307 | Segundo 6696 | Jardas 0* | Unidades de tempo |
| Tonelada 566 | Polegadas cúbicas | Semanas 6141* | Pés 4263* | Unidades de comprimento |
| Quilate 26 | Quarto 2845 | Hora 10776 | Milha 171 | Unidades de velocidade |
| Micrograma | Barril 124 | Meses 6862 | Milímetros 94* | Unidades de temperatura |
| Arroba 25 | Decilitro 18 | Milissegundos | Léguas 146 |  |
| Exemplo: |  |  |  |  |
| Cinema | **Escrita** | **Música** | **Pintura** | **Opções:** |
| Ator 1419 | Livro 4182 | Pauta 28 | Tintas 427* | Cinema |
| Cenário 991 | Autor 2655 | Notas 1530* | Esboço 112 | Escrita |
| Guião 60 | Edição 5050 | Instrumento 1545 | Lápis 257 | Música |
| Câmara 1912 | Poema 643 | Vocalista 41 | Tela 232 | Pintura |
| Protagonista 323 | Narrativa 181 | Coro 384 | Pincel 142 | Escultura |
| Realizador 465 | Resumo 236 | Banda 821 | Moldura 126 | Culinária |
| Personagem 1104 | Publicação 746 | Microfone 88 | Exposição 2029 |  |

**4.** **Frases com adjetivos e exclamações**

De entre opções de adjetivos e exclamações, o participante tem que escolher a opção que está semanticamente relacionada com uma frase-alvo.

**Nível básico:** o participante deve escolher a opção correta;

**Nível intermédio:** existem itens em que o participante deve escolher a opção correta, e itens em que deve escolher a opção incorreta;

**Nível avançado:** o participante deve associar um número a uma letra, de acordo com as frases que se relacionam.

**Nota:** as respostas corretas estão assinaladas a negrito.

| Nível básico (escolher opção correta) | | |
| --- | --- | --- |
| Já só falta uma paragem para chegar a casa.   1. Que bom! 2. Hoje estou cansada! 3. Não gostei disso! 4. Foi muito difícil! | Não sei como vamos fazer este trabalho.   1. **Já sei, tive uma ideia!** 2. Que confusão! 3. Muito bem! 4. Delicioso! | Estou mesmo a chegar!   1. **Anda, despacha-te!** 2. Que trabalho bonito! 3. Que delícia é esta sopa! 4. Esta história é horrível! |
| Estou com medo de voltar a passar por aquele cão!   1. Tem cuidado! 2. Adoro! 3. Que bom! 4. Isso deixa-me muito feliz! | O que achaste deste jogo?   1. **Estiveram todos muito bem!** 2. Ora bolas! 3. Que bom que chegaste! 4. Estou farto disto! | Hoje não vou conseguir ir passear com vocês.   1. **É sempre a mesma coisa!** 2. Que interessante! 3. Acho fantástico! 4. Adorei aquela cena! |
| Gostas da minha camisola nova?   1. É muito bonita! 2. E que bem que ele canta! 3. Tenho muita pena! 4. Estou farta! | A tua sobrinha é muito querida!   1. **Pois é, é adorável!** 2. Prefiro aquele! 3. Que astuto! 4. Tão livre! | Ontem vi finalmente aquele filme de que me falaste e gostei muito.   1. **É lindo! Adorei o fim.** 2. Ele é muito independente. 3. Estou muito calma. 4. Tão generoso! |
| Preferes o livro sobre animais ou o livro de história?   1. O primeiro está engraçado! 2. É um prazer! 3. És muito atencioso! 4. Acalma-te! | Amanhã vou explorar aquela floresta.   1. **Mas isso é perigoso!** 2. Que amável! 3. Ele é tão ciumento! 4. Adorei aquela música! | Consegui arranjar emprego naquela loja.   1. **Isso é muito bom!** 2. Tu não me ofendas! 3. Foi muito carinhoso! 4. Estou cansada. |
| Sei que estás cheia de trabalho, mas precisava que me ajudasses.   1. Claro, tenho todo o gosto em ajudar! 2. Não é nada de especial. 3. Ele toca muito bem! 4. Tão vulgar! | O António até ofendeu o melhor amigo!   1. **Às vezes ele é muito mau.** 2. Tão lento! 3. Ele é muito atento! 4. Que tranquilo! | Podes-me ajudar a escolher um hotel aqui perto?   1. **Aquele no final na rua é muito bom!** 2. Gosto muito! 3. Isso é desonesto! 4. É uma invejosa! |
| Não te vejo a fazer um grande esforço para corrigir as coisas!   1. Isso é muito injusto! 2. Foste muito inteligente. 3. Tão desajeitado! 4. Foi muito divertido! | Nunca imaginei haver tanta gente a ler o meu livro!   1. **Então, mas tu escreves lindamente!** 2. Estou muito confuso! 3. Nem sou assim tão alto! 4. Muito equilibrado! | Como te sentes hoje?   1. **Estou ótimo!** 2. Sou uma pessoa muito sincera. 3. És muito astuto. 4. Que revoltante! |
| Quando era pequeno estava sempre a gritar.   1. Devia ser tão chato! 2. É demasiado leve! 3. Brilhante! 4. Talvez veja amanhã! | Não sei que fazer.   1. **És muito indecisa.** 2. Que felicidade! 3. Fantástico! 4. Estou magro! | O que achaste daquele trabalho?   1. **Era muito difícil!** 2. Tu consegues! 3. Muito bem! 4. És sempre o mesmo! |
| Ontem não fiz nada o dia todo.   1. És muito preguiçoso! 2. Muito educado! 3. Agora não! 4. Isso é tão pequenino! | Vou trabalhar mais para conseguir um cargo melhor na empresa!   1. **És muito ambiciosa!** 2. É muito agradável! 3. É muito longe! 4. Está tão quente! | Acho que não vou conseguir fazer isto.   1. **Não devias ser tão insegura!** 2. Que querido! 3. Magnífico! 4. É gigante! |
| Exemplo: O João voltou a meter-se em problemas.   1. É muito conflituoso! 2. Que alegre! 3. Muito sensível. 4. Vaidoso! |  |  |

| Nível intermédio | | |
| --- | --- | --- |
| Escolher opção correta: | | |
| Viro ali à esquerda, depois à direita e sigo em frente naquela rua!   1. É proibido ir por ali! 2. Que triste! 3. Ele é um palerma! 4. Muito honesto. | A tua irmã está muito grande!   1. **Sim, ela está a ficar muito alta.** 2. Socorro! 3. É muito fácil! 4. Que desprezível! | Adorei aquele vídeo que me sugeriste!   1. **É giro!** 2. Tão falador! 3. Estás feio. 4. Eu sou o melhor! |
| Estás bem?   1. Sinto-me péssima! 2. Ele é muito guloso! 3. É terrível! 4. Tão escuro! | Eu já pedi ao Gabriel para fazer isso.   1. **Ótimo!** 2. Quero muito! 3. Está pior. 4. É tão básico! | Queres que comece a fazer agora?   1. **Com a máxima urgência!** 2. Acho lindo! 3. Muito completo! 4. És muito instável! |
| Achas bem fazer o concerto agora?   1. É a altura perfeita! 2. Está descansado! 3. Ela é tão individualista! 4. Estás muito silencioso. | Há outra coisa que queria conversar com vocês.   1. **Até fico preocupado!** 2. Não acho muito bonito! 3. É muito caro! 4. Isso é errado! | Acho que podemos fazer assim.   1. **Isso é brilhante!** 2. Tanta sujidade! 3. Estou farto disto! 4. Ela é muito saudável. |
| Estou farto que ele faça sempre o mesmo!   1. Devias ser mais tolerante! 2. Muito científico! 3. Que divertido! 4. Não é muito barulhento. | Ontem estive a arrumar a casa toda.   1. **Sempre foste muito organizado.** 2. É uma desilusão! 3. Parece ser honesto. 4. És um curioso! | Foi aquele bombeiro que me salvou!   1. **Foi muito corajoso!** 2. É diferente! 3. Acho que é rápido. 4. Isso é horrível! |
| Exemplo: O que te aconteceu ontem?   1. Estava cansada. 2. Foi horrível! 3. Muito falso. 4. Feliz! |  |  |
| Escolher opção errada: | | |
| Gostei tanto desta aventura!   1. O João é muito chato. 2. Também eu! 3. Até sinto pena por ter terminado! 4. Foi fantástica! | O que achaste dos teus novos alunos?   1. **Que bom!** 2. São um grupo muito simpático! 3. Acho que são um pouco desorganizados! 4. Só fazem asneiras! | Achas que é uma boa ideia?   1. **Que tristeza, Maria!** 2. Fantástica! 3. Sim, adoro a tua forma de pensar! 4. Achei fascinante! |
| Fizeram esta festa para mim?   1. Que imbecil! 2. Surpresa! 3. Claro que sim! 4. Tu mereces! | O Filipinho já nasceu!   1. **É genial!** 2. Parabéns! 3. Boa! 4. Muito bem! | Boa tarde, como está?   1. **Até que enfim!** 2. Nunca estive melhor! 3. Estou ótimo! 4. Sinto-me aborrecido! |
| Consegui resolver aquele problema que te tinha falado!   1. Estás muito estranho. 2. Estou muito orgulhosa de ti! 3. Sempre soube que conseguias! 4. Que bom! | A minha filha é a melhor aluna da turma!   1. **Vejo que estás cansado.** 2. Ela é tão inteligente! 3. Sempre foi muito trabalhadora! 4. Ela é muito esforçada! | Podemos ir, já estou pronta para sair.   1. **Está muito frio.** 2. Estás muito elegante! 3. Adoro a roupa! 4. Que bonita! |
| Como dormiste?   1. Estou tão empolgada! 2. Muito bem! 3. Sinto-me muito descansada. 4. Mal! | Porquê que deixaste de aprender a cozinhar?   1. **Adorei a peça!** 2. Era muito difícil! 3. É desinteressante. 4. Estou farto! | O que achaste do espetáculo?   1. **Isso é muito definitivo!** 2. Foi maravilhoso! 3. Que bem que dançavam! 4. Foi tão lindo! |
| Exemplo: Como me saí nesta avaliação?   1. Acho que és muito alto! 2. Muito bem! 3. Achei que estiveste despassarado. 4. Foste muito perfecionista. |  |  |

| Nível avançado | | |
| --- | --- | --- |
| Há aqui coisas que me baralharam. |  | Realmente isto é confuso! |
| Só falta tratar da decoração. |  | Mas está a ficar tudo ótimo! |
| Como está o tempo? |  | Hoje está um dia muito frio. |
| Não consegui entregar o trabalho a tempo. |  | Que pena! |
| Como está o gatinho? |  | Ótimo, sempre a brincar! |
| Não sei se vou conseguir fazer o que me pediste. |  | Que pena, precisava mesmo! |
|  |  |  |
| O que achas desta jarra? |  | É linda! |
| A partir de hoje vou começar a estudar mais. |  | Isso é muito sensato da tua parte! |
| O meu cão está sempre a saltar. |  | Tão brincalhão! |
| A Catarina não parava de sorrir. |  | Ela é uma pessoa muito alegre. |
| Que se passa contigo? |  | Estou um pouco nervosa. |
| O António disse que ia trabalhar, mas eu vi-o no café. |  | Ele consegue ser tão mentiroso! |
|  |  |  |
| Estou a ver que estás animado com o jogo. |  | Sinto-me muito confiante! |
| Adoro escalar montanhas! |  | És um verdadeiro aventureiro! |
| O que achaste daquele carro? |  | Um pouco lento. |
| O Nuno está sempre a comprar roupa. |  | Ele sempre foi muito vaidoso. |
| Porque é que estás a olhar assim para mim? |  | Estás com um ar desconfiado. |
| Como é que ele está tão calmo? |  | Ele é muito paciente. |
|  |  |  |
| Pensei doar parte da herança. |  | Isso é muito gentil da tua parte. |
| Que achas deste casaco? |  | É muito grande! |
| Se não se despacham vão ficar de castigo! |  | Hoje estás muito sério! |
| O Tiago está sempre a esquecer-se do guarda-chuva! |  | Que despassarado! |
| Que tal este vestido? |  | É muito decotado! |
| Que pensas do sobrinho da Isabel? |  | Muito bem-educado. |
|  |  |  |
| Como foi o teste? |  | Difícil. |
| Que achaste do pai dela? |  | Muito exigente. |
| Porquê que o Afonso se mete sempre em confusões? |  | É conflituoso! |
| Ontem voltei a partir um copo. |  | Desajeitado! |
| A Joana é trabalhadora. |  | É muito esforçada! |
| Ontem fui ao cinema. |  | Que bom! |
|  |  |  |
| Pode ser amanhã às oito? |  | Ótimo! |
| Gostas da ideia? |  | Estás louca. |
| O que pensaste da Fernanda? |  | Achei um pouco grosseira. |
| Achei melhor admitir que tinha culpa. |  | É muito humilde da tua parte. |
| Que tal esta camisola? |  | É pequena. |
| Adorei aquela aula! |  | Foi muito dinâmica! |
|  |  |  |
| Exemplo: |  |  |
| Que pensas do Pedro? |  | Muito gentil! |
| Gostas daquele blusão? |  | É lindo! |
| Ontem fui caminhar. |  | Que bom! |

**5.** **Relação parte-todo**

Uma frase-alvo dá um exemplo da relação parte-todo entre duas palavras; de entre opções de palavras, o participante tem que escolher aquela que está correta.

**Nível básico:** opções de resposta fáceis;

**Nível intermédio:** opções de resposta menos evidentes; em alguns exercícios falta a palavra a meio da frase e noutros falta no final;

**Nível avançado:** o participante completa com a palavra que considera mais adequada.

**Nota:** as respostas corretas estão assinaladas a negrito.

| Nível básico (escolher opção correta) |
| --- |
| Cabelo está para cabeça como dentes estão para ______.   1. boca 2. cara 3. braço 4. esmalte |
| Cão está para focinho como pássaro está para ______.   1. bico 2. asa 3. animal 4. ave |
| Cama está para quarto como sofá está para ______.   1. sala 2. garagem 3. casa 4. divisão |
| Lápis estão para estojo como livros estão para ______.   1. estante 2. coleção 3. cama 4. capítulo |
| Casaco está para roupa como alface está para ______.   1. legumes 2. verde 3. campo 4. terra |
| Flor está para orquídea como coelho está para ______.   1. animal 2. cenoura 3. pelo 4. pata |
| Xilofone está para instrumento como pera está para ______.   1. fruta 2. árvore 3. legume 4. bebida |
| Dálmata está para cão como persa está para ______.   1. gato 2. leão 3. pássaro 4. tigre |
| Fruta está para maçã como planeta está para ______.   1. Marte 2. Universo 3. galáxia 4. cometa |
| Álgebra está para matemática como química está para ______.   1. ciência 2. português 3. experiência 4. laboratório |
| Segundo está para minuto como minuto está para ______.   1. hora 2. ano 3. dia 4. século |
| Dias estão para semana como meses estão para ______.   1. ano 2. hora 3. milénio 4. tempo |
| Exemplo: Ecrã está para computador como parede está para ______.   1. divisão 2. porta 3. teto 4. cimento |

| Nível intermédio (escolher opção correta) |
| --- |
| Guitarra está para ______ como piano está para teclas.   1. cordas 2. música 3. percussão 4. instrumento |
| Página está para livro como lâmpada está para ______.   1. candeeiro 2. teto 3. luz 4. eletricidade |
| Pétala está para ______ como ramo está para árvore.   1. flor 2. planta 3. jardim 4. campo |
| Atleta está para equipa como espectador está para ______.   1. audiência 2. espetáculo 3. vocalista 4. banda |
| Piano está para ______ como pera está para fruta.   1. instrumento 2. teclas 3. melodia 4. atuação |
| Manga está para ______ como ramo está para árvore.   1. camisola 2. roupa 3. tecido 4. calças |
| Dedo está para mão como folha está para ______.   1. ramo 2. árvore 3. planta 4. jardim |
| Golfinho está para mamífero como sapo está para ______.   1. anfíbio 2. reptil 3. ave 4. invertebrado |
| Rosa está para flor como rubi está para ______.   1. pedra preciosa 2. vermelho 3. joia 4. mineral |
| Vertebrado está para ______ como invertebrado está para polvo.   1. humano 2. cobra 3. minhoca 4. camarão |
| Folha está para ______ como pétala está para flor.   1. árvore 2. jardim 3. fruta 4. estufa |
| Aluno está para escola como trabalhador está para ______.   1. empresa 2. emprego 3. salário 4. direção |
| Exemplo: Roda está para ______ como pata está para gato.   1. carro 2. barco 3. pneu 4. travão |

| Nível avançado |
| --- |
| Lobos estão para alcateia como ovelhas estão para… rebanho |
| Livros estão para capítulos como séries estão para… episódios |
| Palavra está para letras como parágrafo está para… frases/palavras |
| Equipa está para jogadores como exército está para… soldados |
| Presidente está para república como rei está para… monarquia |
| Cantor está para coro como jogador está para… equipa |
| Tango está para dança como jazz está para… música |
| Lobo está para carnívoro como vaca está para… herbívoro |
| Nigéria está para África como França está para… Europa |
| Sala de aula está para escola como cozinha está para… casa |
| Areia está para deserto como água está para… oceano |
| Asa está para pássaro como barbatana está para… peixe |
| Exemplo: Cães estão para matilha como abelhas estão para… enxame |

**6.** **Frases anómalas do ponto de vista semântico**

São apresentadas frases como estando semanticamente corretas ou incorretas, e é pedida uma decisão de sim ou não.

**Nível básico:** frases pequenas e mais simples, para o participante escolher se estão corretas ou erradas;

**Nível intermédio:** frases maiores e um pouco complexas; o participante também deve identificar o erro nas frases que considera incorretas (dar várias palavras da frase como opção e o participante escolhe);

**Nível avançado:** frases maiores e mais complexas; o participante também deve identificar o erro nas frases que considera incorretas (dar várias palavras da frase como opção e o participante escolhe) e corrigir a palavra errada com uma que considere correta e adequada, escrevendo.

**Nota:** o erro das frases incorretas está assinalado a negrito.

| Nível básico | | |
| --- | --- | --- |
| Frases corretas: | | |
| A minha casa tem sete janelas e uma varanda. | Os netos do Paulo cresceram muito e já são casados. | No próximo ano vou para a reforma. |
| Está quase a começar o tempo das colheitas. | À noite, o Pedro passeava de mãos enfiadas nos bolsos. | Olá! Eu sou o Diogo. E tu? |
| A primeira coisa que me chamou a atenção foi o caderno. | A ideia era ajudar os mais novos a fazerem as tarefas de hoje. | Aquela senhora tem o cabelo branco como a neve. |
| Exemplo: Ontem o João foi ajudar a Maria a fazer o trabalho. |  |  |
| Frases incorretas: | | |
| A pizza está muito quente para se beber. | Aquela planta **limpa** flores brancas. | A Maria é uma professora muito **azul**. |
| Toda a gente dizia que ontem ia chover, mas esteve noite. | Estavam muito animados quando apareceu um **lanche**. | Quanto mais se tenta organizar, maior é a **escada**. |
| Havia ali grandes tabuleiros com peras e maçãs loiras. | O senhor tinha barbas **rápidas** e brancas, e usava óculos. | O João e o André falavam e riam altíssimo no meio do **copo**. |
| Exemplo: Os pais dão sempre o seu melhor para educar mal os filhos. |  |  |

| Nível intermédio | | |
| --- | --- | --- |
| Frases corretas: | | |
| Fui a uma praia muito grande onde havia rochedos maravilhosos.   1. Praia 2. Grande 3. Onde 4. Rochedos 5. Maravilhosos | Ao lado do senhor Zé, que é motorista, vinha uma senhora que ninguém conheceu.   1. Senhor 2. Motorista 3. Senhora 4. Ninguém 5. Conheceu | As portas da estufa e do galinheiro ficam nas traseiras da casa.   1. Portas 2. Estufa 3. Galinheiro 4. Traseiras 5. Casa |
| Estive nervoso a manhã toda por causa da apresentação que tenho que fazer no meu emprego.   1. Nervoso 2. Manhã 3. Apresentação 4. Fazer 5. Emprego | Quando ela acabou de falar, toda a sala ficou em silêncio enquanto a olhavam com admiração.   1. Acabou 2. Falar 3. Silêncio 4. Olhavam 5. Admiração | Tinha tanto sono, que me fui logo deitar e adormeci no mesmo instante.   1. Tanto 2. Sono 3. Deitar 4. Adormeci 5. Instante |
| Além do meu pai, também a minha tia Adelaide me acompanhou ao dentista.   1. Além 2. Pai 3. Tia 4. Acompanhou 5. Dentista | O funcionário permitiu a entrada do Quim no restaurante de marisco.   1. Funcionário 2. Permitiu 3. Entrada 4. Restaurante 5. Marisco | A Inês ficou sem saber o que dizer depois da Ana lhe contar aquela história toda.   1. Saber 2. Dizer 3. Contar 4. História 5. Toda |
| A menina foi brincar com as bonecas enquanto a mãe fazia um bolo.   1. Menina 2. Brincar 3. Bonecas 4. Fazia 5. Bolo |  | **Exemplo:** Quando sai de casa estava muito bom tempo, mas mais tarde já chovia. |
| Frases incorretas: | | |
| A Isabel perguntava com o velho jardineiro que era seu grande amigo.   1. Perguntava 2. Velho 3. Jardineiro 4. Grande 5. Amigo | As crianças estão muito divertidas a brincar com a **quinzena.**   1. Crianças 2. Estão 3. Divertidas 4. Brincar 5. Quinzena | Destacava-se o seu **cadeirão** para resolver e corrigir problemas.   1. Destacava-se 2. Cadeirão 3. Resolver 4. Corrigir 5. Problemas |
| Quando terminei a corrida, o meu coração batia mais depressa do que o banho.   1. Terminei 2. Corrida 3. Coração 4. Depressa 5. Banho | Ontem **adormeci** a uma peça de teatro sobre a história de Portugal.   1. Adormeci 2. Peça 3. Teatro 4. Sobre 5. História | Quando vemos um livro numa biblioteca pegamos nele, **molhamos** e folheamos.   1. Livro 2. Biblioteca 3. Pegamos 4. Molhamos 5. Folheamos |
| Os alunos tiveram sustos de tosse porque eram alérgicos ao giz.   1. Alunos 2. Sustos 3. Tosse 4. Alérgicos 5. Giz | A Teresa e a Luísa têm o sonho de ser **guitarras** profissionais, mas não encontram treinador.   1. Sonho 2. Guitarras 3. Profissionais 4. Encontram 5. Treinador | O António estava vermelho de **comida**, depois do que o Pedro lhe fez.   1. Estava 2. Vermelho 3. Comida 4. Depois 5. Fez |
| O rei pediu para ficarem o casamento da sua filha.   1. Rei 2. Pediu 3. Ficarem 4. Casamento 5. Filha |  | **Exemplo:** Finalmente vou conseguir **cantar** o meu livro preferido.   1. Finalmente 2. Conseguir 3. Cantar 4. Livro 5. Preferido |

| Nível avançado | | |
| --- | --- | --- |
| Frases corretas: | | |
| A avó estava a arrumar as gavetas quando encontrou fotografias antigas do seu casamento, ficando muito emocionada.   1. Arrumar 2. Gavetas 3. Encontrou 4. Fotografias 5. Antigas 6. Casamento 7. Emocionada | Claro que a conversa acabou depois do que aconteceu e as pessoas ficaram todas caladas, a olhar umas para as outras.   1. Conversa 2. Acabou 3. Aconteceu 4. Pessoas 5. Ficaram 6. Caladas 7. Olhar | As crianças foram para o jardim brincar com os cães e gatos, enquanto os pais ficaram a acabar de almoçar.   1. Crianças 2. Jardim 3. Brincar 4. Cães 5. Gatos 6. Acabar 7. Almoçar |
| Era uma praia muito grande, onde havia muitos rochedos e as ondas do mar eram muito grandes.   1. Praia 2. Grande 3. Havia 4. Rochedos 5. Ondas 6. Mar 7. Grandes | Há pouco uns turistas pediram direções para a quinta e a Joana disse-lhes que bastava virar à direita.   1. Turistas 2. Pediram 3. Direções 4. Quinta 5. Disse-lhes 6. Bastava 7. Virar | Quando chego a casa, deparo-me com a sala toda desarrumada e suja, por causa da festa de ontem à noite.   1. Chego 2. Deparo-me 3. Sala 4. Desarrumada 5. Suja 6. Festa 7. Noite |
| O meu livro preferido é sobre o mistério de uma casa abandonada na colina, em que existem muitos fantasmas.   1. Preferido 2. Mistério 3. Casa 4. Abandonada 5. Colina 6. Existem 7. Fantasmas | Na opinião do pai, ter um cão dá muito trabalho, mas ter um melhor amigo peludo vale a pena e traz muita felicidade.   1. Opinião 2. Pai 3. Trabalho 4. Ter 5. Amigo 6. Pena 7. Felicidade | **Exemplo:** As pessoas reuniram-se no largo da aldeia, sentadas nas pedras que por lá havia espalhadas.   1. Pessoas 2. Reuniram-se 3. Largo 4. Aldeia 5. Sentadas 6. Pedras 7. Espalhadas |
| Frases incorretas: | | |
| Com muitas lágrimas, a Dona Antónia despediu-se daquela guitarra velha, com pouca luz, onde viveu durante 20 anos.   1. Lágrimas 2. Despediu-se 3. Daquela 4. Guitarra 5. Velha 6. Luz 7. Viveu   Correção: casa | O meu pai foi assistir ao jogo da seleção com os amigos, enquanto eu e a minha mãe fomos ao **cinema** comprar ingredientes para fazer o meu bolo preferido.   1. Pai 2. Assistir 3. Jogo 4. Amigos 5. Cinema 6. Ingredientes 7. Bolo   **Correção:** supermercado | No final daquela manhã, as gémeas chegaramum pouco atrasadas e bateram no vidro da porta, pedindo licença para **sair**.   1. Manhã 2. Chegaram 3. Atrasadas 4. Bateram 5. Porta 6. Pedindo 7. Sair   **Correção:** entrar |
| Amanhã vou jantar contigo, apesar de não poder chegar muito tarde a casa, por causa de ter que me levantar atrasada no dia seguinte.   1. Jantar 2. Contigo 3. Chegar 4. Tarde 5. Levantar 6. Atrasada 7. Seguinte   Correção: cedo | A minha mãe nasceu no Alentejo, numa aldeia pequena, onde passa um rio com muitos **gatinhos**.   1. Mãe 2. Nasceu 3. Aldeia 4. Pequena 5. Passa 6. Rio 7. Gatinhos   **Correção:** peixinhos | O sonho do André é viajar pelo mundo, para conhecer todas as tradições e culturas dos outros **concelhos**, enquanto faz novas amizades.   1. Viajar 2. Mundo 3. Conhecer 4. Tradições 5. Culturas 6. Concelhos 7. Amizades   **Correção:** países |
| Tomo o pequeno-almoço por volta das oito da manhã, depois de tomar um banho quente e relaxante, enquanto sonho as minhas músicas preferidas.   1. Pequeno-almoço 2. Manhã 3. Tomar 4. Banho 5. Relaxante 6. Sonho 7. músicas   Correção: ouço | A Sara achava que os amigos se tinham **sentido** do seu aniversário, mas afinal eles estavam a preparar-lhe uma festa surpresa.   1. Achava 2. Amigos 3. Sentido 4. Aniversário 5. Estavam 6. Preparar-lhe 7. Festa   **Correção:** esquecido | **Exemplo:** Não sei se já reparaste, mas já acabei de arrumar a casa, já limpei tudo e já estou a acabar de **perguntar** o almoço.   1. Reparaste 2. Acabei 3. Arrumar 4. Casa 5. Limpei 6. Acabar 7. Perguntar   **Correção:** fazer |

**7.** **Definição semântica**

O participante vê uma palavra-alvo que também pode ser usada em palavras compostas; tem que decidir se a combinação resulta numa palavra composta adequada ou não.

**Nível básico:** palavras mais simples e com maior familiaridade;

**Nível intermédio:** palavras mais complexas, com opções de resposta mais semelhantes;

**Nível avançado:** palavras ainda mais complexas, com menor familiaridade e opções de resposta mais semelhantes.

**Nota:** as respostas corretas estão assinaladas a negrito.

| Nível básico | | |
| --- | --- | --- |
| Rolha   1. Saca-rolhas 2. Guarda-rolhas 3. Tira-rolhas 4. Abre-rolhas | Palavra   1. **Palavra-chave** 2. Palavra-mestre 3. Palavra-mãe 4. Palavra-grande | Joias   1. **Guarda-joias** 2. Saca-joias 3. Monta-joias 4. Arruma-joias |
| Roupa   1. Guarda-roupa 2. Dobra-roupa 3. Abre-roupa 4. Poupa-roupa | Chuva   1. **Guarda-chuva** 2. Chama-chuva 3. Limpa-chuva 4. Para-chuva | Louça   1. **Lava-louça** 2. Seca-louça 3. Limpa-louça 4. Desinfeta-louça |
| Raios   1. Para-raios 2. Protege-raios 3. Trava-raios 4. Cessa-raios | Gotas   1. **Conta-gotas** 2. Cai-gotas 3. Goteiro 4. Guarda-gotas | Couve   1. **Couve-flor** 2. Colhe-couve 3. Couve-campo 4. Tira-couve |
| Moedas   1. Porta-moedas 2. Poupa-moedas 3. Guarda-moedas 4. Arruma-moedas | Flor   1. **Beija-flor** 2. Flor-pássaro 3. Rouba-flor 4. Cão-flor | Cavalo   1. **Cavalo-marinho** 2. Cavalo-voador 3. Arruma-cavalo 4. Cavalo-balão |
| Rotações   1. Conta-rotações 2. Calcula-rotações 3. Mede-rotações 4. Soma-rotações | Peixe   1. **Peixe-espada** 2. Peixe-persa 3. Tira-peixe 4. Labrador-peixe | Porco   1. **Porco-espinho** 2. Pica-porco 3. Porco-gordo 4. Aranha-porco |
| Chaminé   1. Limpa-chaminés 2. Lava-chaminés 3. Salva-chaminés 4. Escova-chaminés |  | **Exemplo:** Nódoas   1. **Tira-nódoas** 2. Limpa-nódoas 3. Lava-nódoas 4. Para-nódoas |

| Nível intermédio | | |
| --- | --- | --- |
| Saia   1. Minissaia 2. Saia-mini 3. Maxissaia 4. Curta-saia | Sol   1. **Girassol** 2. Vira-sol 3. Rodassol 4. Apanha-sol | Lei   1. **Decreto-lei** 2. Edita-lei 3. Lei-sentença 4. Despacho-lei |
| Tempo   1. Passatempo 2. Tempo-prazer 3. Foge-tempo 4. Supera-tempo | Pé   1. **Pontapé** 2. Extrapé 3. Pézada 4. Sobrepé | Carro   1. **Autocarro** 2. Carronomia 3. Sociocarro 4. Carrologia |
| Assinado   1. Abaixo-assinado 2. Subassinado 3. Pedido-assinado 4. Acima-assinado | Amor   1. **Amor-perfeito** 2. Belo-amor 3. Amor-divino 4. Maravilhoso-amor | Estrada   1. **Autoestrada** 2. Estrada-rápida 3. Sobrestrada 4. Estradologia |
| Criado   1. Malcriado 2. Super-criado 3. Bemcriado 4. Autocriado | Dizer   1. **Maldizer** 2. Dizer-bem 3. Sobredizer 4. Não-dizer | Papéis   1. **Pisa-papéis** 2. Pousa-papés 3. Segura-papéis 4. Prende-papéis |
| Mesa   1. Sobremesa 2. Pós-mesa 3. Submesa 4. Sociomesa | Económico   1. **Socioeconómico** 2. Sobeconómico 3. Micro-económico 4. Pseudoeconómico | Tratar   1. **Maltratar** 2. Tratar-melhor 3. Bemtratar 4. Extratar |
| Erva   1. Erva-doce 2. Erva-salgada 3. Boa-erva 4. Erva-açucar |  | **Exemplo:** Visto   1. **Mal-visto** 2. Pós-visto 3. Lava-visto 4. Porta-visto |

| Nível avançado | | |
| --- | --- | --- |
| Vinho   1. Vinagre 2. Vinalto 3. Aerovinho 4. Malvinho | Plano   1. **Planalto** 2. Plabaixo 3. Perplano 4. Placima | Hora   1. **Embora** 2. Sub-hora 3. Tubora 4. Mal-hora |
| Perna   1. Pernalta 2. Perlonga 3. Perbaixa 4. Percurta | Boca   1. **Boquiaberto** 2. Fecha-boca 3. Boquiamplo 4. Abre-boca | Filho   1. **Fidalgo** 2. Filho-nobre 3. Fidalto 4. Malfilho |
| Espaço   1. Ciberespaço 2. Hiperespaço 3. Sobrespaço 4. Autoespaço | Nave   1. **Aeronave** 2. Cibernave 3. Navologia 4. Nanonave | Homem   1. **Lobisomem** 2. Homem-água 3. Vampiromem 4. Tigromem |
| Ginástica   1. Hidroginástica 2. Desginástica 3. Ginásticonomia 4. Hiperginástica | Arte   1. **Destarte** 2. Solarte 3. Aero-arte 4. Restarte | Cabeça   1. **Cabisbaixo** 2. Cabissolto 3. Cabisalto 4. Cabismagro |
| Perna   1. Pernilongo 2. Sub-perna 3. Pernicurto 4. Pernibaixo | Pérola   1. **Madrepérola** 2. Freipérola 3. Padrepérola 4. Granpérola | Água   1. **Aguardente** 2. Aguafogo 3. Aguarrasa 4. Aguamorta |
| Mão   1. Corrimão 2. Permão 3. Seguimão 4. Pegamão |  | **Exemplo:** Sexo   1. **Unissexo** 2. Sociossexo 3. Persexo 4. Sexobaixo |

**8.** **Contexto semântico**

Identificar anomalias semânticas num texto; os exercícios são estruturados em escolha múltipla ou formato certo/errado, com diferentes níveis de dificuldade.

**Nível básico:** dois textos pequenos (um correto e um incorreto), e o participante escolhe aquele que está correto (opções de resposta: 1 ou 2);

**Nível intermédio:** textos de tamanho médio (3/4 frases) com erros menos evidentes, em que o participante escolhe se fazem sentido ou não (opções de resposta: sim ou não);

**Nível avançado:** textos maiores, mais complexos, e com mais pormenores, cujos erros são menos evidentes (opções de resposta: sim ou não).

**Nota:** nas frases/textos incorretos o erro está assinalado a negrito.

| Nível básico |
| --- |
| Frases/textos corretos: |
| De manhã, a Rita foi ao supermercado que fica perto da sua casa. Foi comprar azeite, alhos, vinho, pão, sumos, queijo, fiambre, comida para gato, repolho e beringelas. |
| - Acorda, Diogo! Já estás atrasado para a escola!  - Ai que sono! Não me quero levantar! |
| A mãe encheu a minha chávena e a dela, e levou-as para a mesa da sala. Ao sair da cozinha pediu-me para levar o pão, a manteiga e uma faca. |
| A casa da minha avó é rodeada de campo, onde há várias árvores de fruto que dão muita sombra. Por isso, quando está bom tempo, a família reúne-se sempre numa mesa de pedra e almoça ao ar livre. |
| Apressada, a Fernanda foi para o seu quarto. Abriu a porta do guarda-roupa e escolheu a primeira roupa que viu. |
| O João estava desesperado porque se perdeu há várias horas e não conseguia encontrar o caminho. No entanto, viu um senhor que o conseguiu ajudar. |
| O Ivo é um rapaz de 11 anos. Tem cabelo castanho, olhos verdes e um sorriso simpático. |
| O Afonso foi-se deitar no sofá, porque durante o jantar começou a ficar enjoado. Espero que amanhã já se sinta melhor. |
| O gato saltou de repente e deu uma corrida até ao fundo do jardim. A Joana correu atrás dele, mas tropeçou numa pedra e caiu na relva. |
| No final da noite estava uma temperatura muito agradável. Portanto, fomos fazer um pequeno passeio pela cidade. |
| Exemplo: Na semana passada comecei a fazer uma caminhada todos os dias, para desanuviar um pouco. No entanto, esta semana tenho muito trabalho e não vou conseguir fazer. |
| Frases/textos incorretos: |
| Ontem trabalhei imenso na ourivesaria. Contudo, a água estava fria. |
| - Olá! Como estás?  - Ontem o comboio chegou atrasado. |
| Quando a Joana chegou do treino de futebol já era muito tarde, por isso, antes de ir dormir, apenas teve tempo para secar o cabelo. Depois disso foi lavá-lo. |
| O Afonso está muito entusiasmado porque amanhã vai finalmente ao barbeiro para rapar o cabelo. No dia seguinte vais arranjar o cabelo. |
| Quando, depois de uma hora, o pai regressou com as fotografias, o Pedro já tinha saído. Apesar disso, estava muito vento e chovia torrencialmente. |
| Durante o jantar, a minha mãe pediu-me para passar o pão. Amanhã a Sofia vai viajar. |
| Aquele parecia um dia normal. Ela levantou-se às oito da manhã, tomou um banho relaxante, comeu os seus cereais preferidos e dirigiu-se para o emprego. Por isso, esteve muito calor. |
| A Maria penteou o cabelo, pôs um colar e saiu de casa. Quando chegou ao restaurante a sua melhor amiga já lá estava. Na segunda tem que ir a uma consulta. |
| O rei queria que a filha casasse com um homem bonito, corajoso, rico e, acima de tudo, queria que fosse um homem com bom senso. Para tal, vai lavar o carro e depois vai ao supermercado. |
| Na minha vila passa um pequeno rio com água tépida e temperatura amena. Os meninos vão para a escola amanhã. |
| Exemplo: Amanhã vou cortar e arranjar o cabelo. Apesar disso, o mercado fechou. |

| Nível intermédio |
| --- |
| Frases/textos corretos: |
| Era Sábado à tarde e a Maria tinha de preparar todos os pormenores da festa de aniversário da sua filha Mafalda. À noite, foram a sua casa os amigos, tios, avós e padrinhos da filha para festejarem todos juntos. |
| A princesa fugiu para a floresta, onde encontrou uma pequena casa. Bateu à porta, mas ninguém abriu. Apesar disso, viu que estavam umas chaves pousadas na beira da janela, e decidiu tentar abrir a porta com elas. |
| O Pedro e a Catarina passeavam à beira-mar quando repararam numa nuvem muito negra que se aproximava. Além disso, também começou a trovejar. Vendo esta pioria no tempo, decidiram que era melhor voltar para casa. |
| Assim que parou de nevar, as crianças foram brincar para o jardim. Enquanto isso, os pais conversavam na cozinha e acabavam de preparar o almoço de aniversário do Paulinho. |
| A Andreia vai sempre ao mesmo supermercado e sempre à mesma hora, por isso, quando a Jacinta quer falar com ela, sabe sempre onde a encontrar. No entanto, naquele dia, a família da Andreia veio visitá-la, portanto a Jacinta não a viu. |
| Quando era pequeno, o meu pai teve um burro. Ele vivia numa casa com muito terreno, por isso o burro tinha muito espaço. Ainda hoje o meu pai fala daquele animal com muita emoção. |
| Um dos mais famosos escritores do mundo morreu hoje, aos 84 anos, vítima de um ataque cardíaco. É considerado o maior poeta do seu tempo, tendo escrito mais de 20 livros. Atualmente estava a escrever um novo livro com o seu filho, que seria lançado em setembro. |
| Sempre adorei crianças e, por isso, ser professora traz-me muita felicidade. Saber que estou a ajudar aqueles meninos a crescer, que estou a moldar a sua educação, que lhes estou a ensinar as bases que serão necessárias para o seu futuro, é o melhor sentimento do mundo. |
| Exemplo: O Rui e o Gonçalo foram espreitar o jardim, depois de terem ouvido um som muito estranho. Quando lá chegaram, depararam-se com um pavão que tinha fugido do parque ao lado e andava lá a passear. |
| Frases/textos incorretos: |
| O pinguim é uma ave com asas adaptadas para nadar e mergulhar e, portanto, estão amplamente distribuídos pelos desertos. Aliás, a maior parte dos pinguins encontram-se na Antártida. |
| Realmente hoje estou muito ocupada, por isso acho que não vou ter tempo para lanchar contigo. Mas se amanhã te der jeito, podemos fazer alguma coisa diferente! Por exemplo, pensei que podíamos ir à igreja! Assim podíamos ver alguns animais selvagens, acho que ia ser muito giro! |
| Ainda mal começou o verão e já me sinto muito inchada! Tento beber muita água, mas não vejo diferenças. Acho que vou começar a fazer mais exercício físico e talvez até me inscreva num veterinário com um professor para me ajudar. |
| Com ontem estava um dia de temporal, achei melhor não sair de casa o dia todo. Acabei por ficar no sofá, a ver alguns filmes, ler um livro e fui ao parque. |
| Há muito tempo que não entravam pássaros em minha casa. Como moro ao lado de uma quinta, aprendi a ter muito cuidado para não deixar as portas e janelas abertas para trás. Apesar de todos os cuidados, ontem entrou um carro e tive que andar pela casa toda atrás dele. |
| O animal preferido da Matilde é o macaco. Por isso, no seu aniversário, os pais decidiram levá-la ao jardim zoológico. Este foi um dos dias mais felizes para a menina, que a partir daí queria ir à pastelaria todos os dias! |
| Às quatro da tarde, todos se dirigiram para o largo da aldeia, onde ia haver uma pequena festa. A Jéssica dançou o tempo todo, enquanto a irmã esteve sentada num banco de pedra. Três horas depois começava já a amanhecer e ficar frio, por isso, as irmãs decidiram voltar para casa. |
| Lembro-me tão bem do meu primeiro dia de escola! A minha mãe foi-me levar e eu estava nervoso, mas também muito entusiasmado. Quando cheguei, entrei no portão e havia muitos meninos no pátio. Entretanto a campainha tocou e fomos todos para o restaurante. |
| Exemplo: A Sofia é tua amiga, mora no teu prédio e mesmo assim não a vês há 2 meses? Acho que lhe devias ligar e convidar para passear, até podiam aproveitar para ir àquele restaurante que abriu na semana passada. Ouvi dizer que o prato de bacalhau é ótimo e o livro de legumes também é muito bom! |

| Nível avançado |
| --- |
| Frases/textos corretos: |
| Era uma vez duas crianças. Nasceram no mesmo dia, moravam lado a lado, cresceram juntas e sempre foram as melhores amigas. Agora, 30 anos depois, a vida parece tê-las separado. Vivem em cidades diferentes, desenvolveram uma carreira e criaram uma família. Nenhuma sabe nada sobre a vida da outra desde há vários anos, mas aquele carinho que sempre existiu, ainda se mantém. |
| A Natália era uma rapariga linda, com uma pele muito branca, olhos azuis e cabelo preto. Por onde quer que passasse era impossível que os olhos não ficassem todos postos em si, mas ela parecia não reparar, como se estivesse sempre no seu mundo, alheia ao que se passava à sua volta. Transmitia uma calma e pureza tal, que era impossível não se estar bem perto dela. E eu sentia-me mesmo muito bem perto dela. |
| Um dia estava a dormir no jardim. Era um dia de muito calor e só me queria refrescar. Preparei um batido fresco, fui buscar uma toalha, e lá fui eu para a piscina. Lembro-me perfeitamente. Eram cinco horas, já lá estava há muito tempo, então decidi estender a toalha na relva e deitar-me um pouco. Adormeci, claro. Acordei de repente, sem perceber o que estava a acontecer e eis que o céu estava negro e chovia torrencialmente. |
| O Rafael só adormece depois de uma história contada pelo seu pai. Mas, naquele dia, o turno do pai atrasou e às nove da noite ainda não tinha chegado a casa. O Rafael recusou-se a deitar enquanto o pai não chegasse e não tivesse a sua história. Estava cheio de sono, mas não se deitava. Finalmente, o pai chegou, foi a correr para o quarto e começou a contar uma história sobre uma espada mágica, que só podia ser encontrada pela pessoa mais corajosa do reino. O Rafael adormeceu logo no início da história, mas sonhou com o resto da história. |
| Nunca tinha visto um cavalo assim! Era grande e majestoso, todo negro, com crina comprida e brilhante. Tentei aproximar-se, mas ele ficou nervoso e começou a recuar, por isso, decidi não me mexer e acabei por me sentar naquela pedra grande. Fiquei lá várias horas, a apreciar a sua beleza enquanto relia o meu livro favorito pela décima vez. Quando dei pelas horas já era noite e tinha que voltar para casa. Olhei uma última vez para ele e fui embora. Amanhã voltarei àquele sítio. |
| O Gonçalo, de 10 anos, faz anos hoje e os pais prepararam-lhe um dia muito animado. De manhã foram passear ao parque, onde ele gosta muito de correr e brincar no escorrega. Depois foram almoçar a sua pizza preferida num restaurante que fica lá perto, enquanto os avós preparavam uma festa surpresa. Quando os pais e o Gonçalo chegaram a casa, estavam lá todos os seus amigos para brincar e comer bolo.  O Gonçalo adorou todo o dia e quando se deitou na cama adormeceu logo, tal era o cansaço. |
| E agora o Quim passa a bola a Nico que escorrega no relvado molhado e quase cai. Nico passa a Simão. Simão avança… domina a bola… passa por três jogadores em direção à baliza do adversário… Nico está sozinho e Simão passa a bola. Vai Nico… passa a Simão… chuta a bola e… e… é golo! Gooooolo!!! |
| Aproximamo-nos cuidadosamente da janela. É de noite, estamos sozinhos nesta casa, e existem rumores de haver bruxas nesta zona. Os meus amigos insistiram vir passar o fim de semana a esta casa. Quando ouvi as histórias que se contavam, confesso que não queria vir, mas o que podia fazer? Já tinha dito que vinha e depois ia dizer que afinal tinha medo e já não queria? Não, claro que não. E eis que nos encontramos aqui, a ver uma sombra passar na janela. |
| Exemplo: Quer saber o caminho para Vila Dourada? Sem problemas. Então, é simples. Quando chegar à Casa do Silva vira à direita e segue em frente uns 500 metros. Vai-lhe aparecer uma rotunda e sai na primeira. Depois continua em frente até lhe aparecer uma rua estreita à esquerda, e vira nessa rua. Depois é só virar à direita e está a entrar em Vila Dourada. |
| Frases/textos incorretos: |
| Era terça-feira, 10 de abril e, finalmente, fazia-se sentir a Primavera. Os passarinhos chilreavam na rua e as árvores começavam a ficar cada vez mais cheias de flores.  A Josefina, que tem 20 anos, adorava este tempo e decidiu dar um grande passeio pela sua cidade. Primeiro saiu de casa em direção ao talho para tomar o seu pequeno-almoço, depois apanhou o autocarro número 406 para ir em direção ao shopping e depois ligou à sua amiga Maria para irem almoçar e passear no jardim. |
| Hoje é a minha vez de preparar o jantar. Por isso, fui ao talho comprar um frango e passei no supermercado para comprar alguns ingredientes que faltavam. Quando cheguei a casa, reguei o frango com azeite e temperei com sal e pimenta. Depois pus numa assadeira por cima de uma camada de cebolas cortadas em rodelas, e pus batatas pequenas cortadas em metades à volta. Levei à máquina de lavar por cerca de 1 hora. Um pouco antes do frango estar cozinhado, comecei a preparar o arroz. |
| Os três amigos observavam aquele espetáculo com alguma curiosidade. Nunca tinham ido àquela cidade e até agora estavam a adorar. Era tudo tão diferente! As pessoas pareciam mais simpáticas, a comida típica era deliciosa e havia pequenos espetáculos em todas as ruas. Mas aquele, parecia diferente, parecia mais dramático e por isso lhes chamou a atenção. Era realmente brilhante e maravilhoso, fazendo-os fugir daquele lugar. |
| Quando me levantei estava muito nevoeiro. Ainda assim, achei que me devia equipar e ir correr, como sempre o faço. Trinta minutos depois percebi que tinha tomado uma má decisão. Começou a chover imenso, levantou-se muito vento e fiquei todo encharcado. Tentei voltar rápido para casa mas, com tanto nevoeiro, quase nem via nada à minha frente e vento impedia-me de avançar à velocidade que queria. Estava tanto temporal que havia guarda-chuvas a voar, ramos de árvores a partir, e as estradas começavam a parecer rios. Quando cheguei a casa, só queria tomar um banho de água fria. O que mais desejava naquele momento era conseguir aquecer rápido e poder relaxar um pouco. |
| Ele olhou-a como se fosse a primeira vez. Naquele momento, naquele jardim, tudo pareceu fazer sentido, como se tivesse descido uma luz sobre ela. Tudo o que tinha acontecido, todos os problemas, todas as discussões, trouxeram-nos àquele momento, em que se viam realmente, em que se viam como verdadeiramente são. E caminharam lado a lado naquela praia, onde passaram a tarde toda. |
| Quem diria que amanhã é domingo e tenho tanto trabalho para fazer que nem posso sair. Sair? Nem sequer vou poder continuar a ler o meu livro ou ver um filme! 24 horas parece muito, mas também é pouco. A vida passa num piscar de olhos e quando reparamos já passaram 60 anos. E nessa altura estamos novos, vivemos num tempo diferente daquele em que crescemos e a passagem do tempo parece ainda mais subjetiva. Será que está a passar depressa ou devagar? Não sei. |
| Nos dias da semana, normalmente, levanto-me às seis, tomo um banho rápido, visto a roupa escolhida no dia anterior e apresso-me a sair com o carro. Costumo demorar 15 minutos a chegar à minha empresa mas, como às vezes há trânsito, gosto de sair de casa mais cedo. Quando chego à empresa, dirijo-me para o bar, onde tomo um café e como um pãozinho com manteiga. Quando tenho tempo, aproveito para ler as notícias enquanto não chegam as sete e meia. Quando chega a hora, saio do bar e dirijo-me para casa. |
| Dizem que tenho muito jeito para cozinhar. Todos os domingos fazemos um almoço de família e costumo ser eu a cozinhar, mas hoje quero fazer algo mais elaborado. Pensei fazer um polvo assado, acompanhado por um pão caseiro que já quero experimentar fazer há muito tempo. A massa não parece muito difícil de fazer, só precisei de comprar farinha própria que não tinha, depois é só misturar os ingredientes, amassar, deixar repousar durante algum tempo e gelar até ficar com um aspeto estaladiço. Para sobremesa, já fiz uma mousse de manga com especiarias e está no congelador para ficar mais consistente. |
| Exemplo: Depois de termos bebido copos e copos de água para acalmar a sede, fomos sentar-nos um pouco no sofá, do qual acabamos por não sair no resto da tarde. Levantamo-nos às oito para passear e explorar a cidade. De manhã fomos visitar o museu de arte e fomos ao parque. Almoçamos num restaurante típico e depois fomos visitar o castelo, a catedral e fazer um pequeno passeio pelos jardins lá perto. Caminhamos tanto e ficamos tão cansados que achamos melhor voltar a casa, mesmo ainda sendo de noite. |
